# Supplementary material for: Targeted removal of mitochondrial DNA from mouse and human extrachromosomal circular DNA with CRISPR-Cas9
Source: PubMed Central journal article supplement — Comput Struct Biotechnol J. 2022 Jun 15;20:3059–67. doi: 10.1016/j.csbj.2022.06.028 (PMC9233219; doi:10.1016/j.csbj.2022.06.028), 2022-06-15
Supplement: mmc1.pdf [file mmc1.pdf]

## Supplementary Fig.1

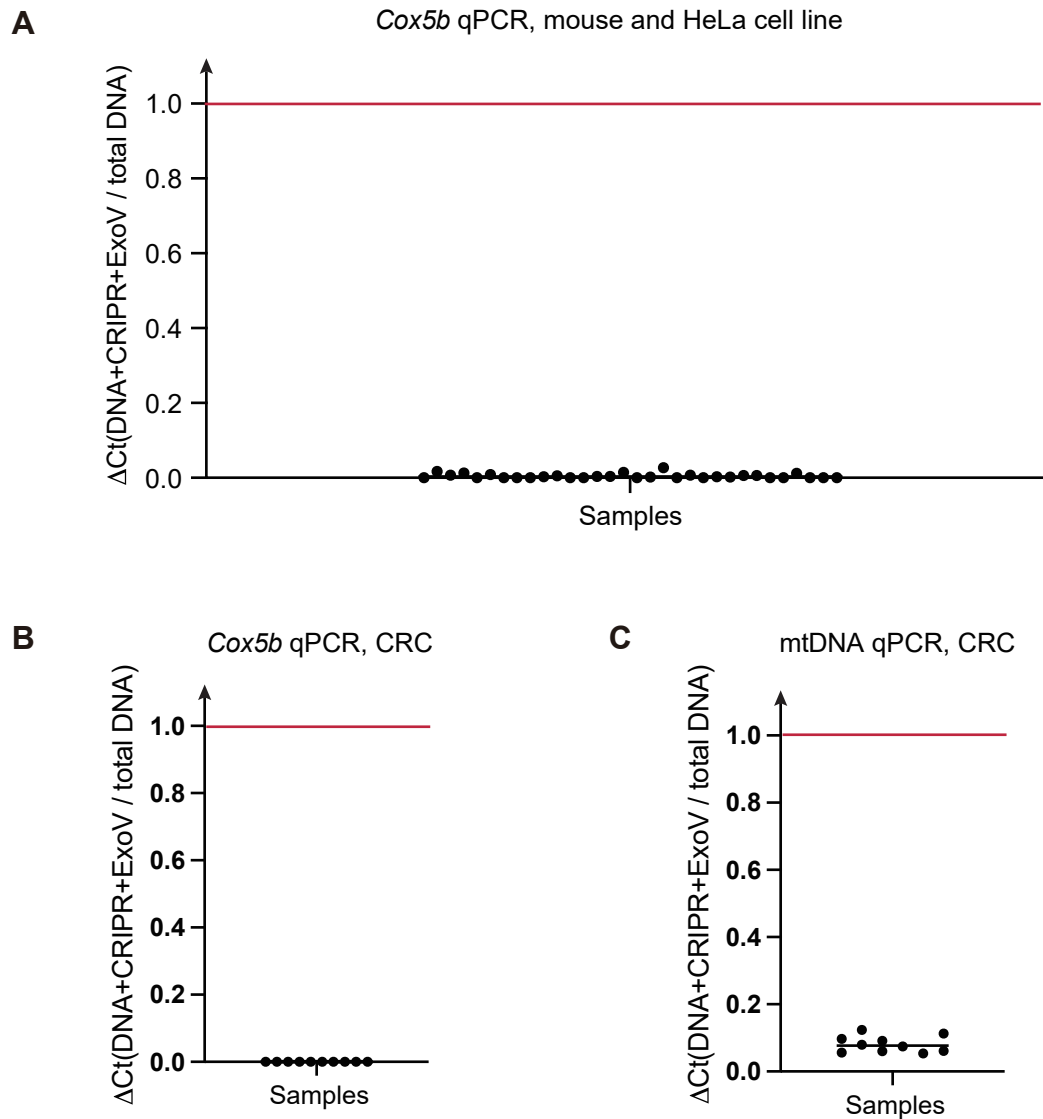

**Supplementary Fig1.** The quality tests for the extracted circular DNA. (A) Quantitative real-time PCR (qPCR) confirmation of the linear DNA removal of mouse and Hela cell line samples. (B) Quantitative real-time PCR (qPCR) confirmation of the linear DNA removal of CRC samples. (C) Quantitative real-time PCR (qPCR) confirmation of the mtDNA removal of CRC samples. Value 1 (red bar) represents the amount of total DNA before CRISPR and Exonuclease V (ExoV) treatment to remove mtDNA and linear DNA. Mouse-*Cox5b* Forward primer: CAGGGT-GACTGACGCCAC, Reverse primer: CAGCCGAAGCAGCGCTAAAA; HeLa-*Cox5b* Forward primer: GGGCAC-CATTTTCCTTGATCAT, Reverse primer: AGTCGCCTGCTCTTCATCAG; CRC-*Cox5b* Forward primer: GGACAAT-ACCAGCGTCGTCT, Reverse primer: TAGTGCAGGTGCTCAGTGTG; CRC-mtDNA Forward primer: GCCCACT-TCCACTATGTCCT, Reverse primer: GATTTTGGCGTAGGTTTGGTCT
